# The need for ecologically realistic studies on the health effects of microplastics

C Lauren Mills<sup>1</sup>, Joy Savanagouder<sup>1</sup>, Marcia de Almeida Monteiro Melo Ferraz<sup>2</sup>, Michael J Noonan<sup>1\*</sup>

1 – The Irving K. Barber Faculty of Science, The University of British Columbia, Okanagan Campus.

2 – Clinic of Ruminants, Faculty of Veterinary Medicine, Ludwig-Maximilians University of Munich, Sonnenstr. 16, Oberschleissheim, 85764, Germany

**\*Corresponding Author:** [michael.noonan@ubc.ca](mailto:michael.noonan@ubc.ca)

**Article type:** Short Communication

Words in the abstract: 238

Number of Figures: 1

Words in main text: 1,424

Number of tables: 0

Number of references: 63

Supplementary material: 1

**Keywords:** Microplastics; terrestrial; health; biomimetic

## 1 **Abstract**

2 Plastic pollution is now so widespread that microplastics are consistently detected in every  
3 biological sample surveyed for their presence. Despite their pervasiveness, very little is known  
4 about the effects of microplastics on the health of terrestrial species. While emerging studies are  
5 showing that microplastics represent a potentially serious threat to animal health, data have been  
6 limited to *in vivo* studies on laboratory rodents that were force fed plastics. The extent to which  
7 these studies are representative of the conditions that animals and humans might actually  
8 experience in the real world is largely unknown. Here, we review the peer-reviewed literature in  
9 order to understand how the concentrations and types of microplastics being administered in lab  
10 studies compare to those found in terrestrial soils. We found that lab studies have heretofore fed  
11 rodents microplastics at concentrations that were hundreds of thousands of times greater than  
12 they would be exposed to in nature. Furthermore, health effects have been studied for only 10%  
13 of the microplastic polymers that are known to occur in soils. The plastic pollution crisis is  
14 arguably one of the most pressing ecological and public health issues of our time, yet existing  
15 lab-based research on the health effects of terrestrial microplastics does not reflect the conditions  
16 that free-ranging animals are actually experiencing. Going forward, performing more true-to-life  
17 research will be of the utmost importance to understand the impacts of microplastics and  
18 maintain the public's faith in the scientific process.

19

## 20 **1. Introduction**

21 The invention of plastics in the early 1900s revolutionized human societies (Thompson et al.,  
22 2009), yet the excessive consumption of short-lived and single-use plastics has resulted in  
23 plastics accumulating almost everywhere on Earth (Cole et al., 2011; Rochman & Hoellein,

24 2020). Plastic pollution is now so widespread that microplastics – plastic particles between 0.1  
25  $\mu\text{m}$  and 5 mm – are consistently detected in every biological sample surveyed for their presence  
26 (Duis & Coors, 2016; Bergami et al., 2020). The ubiquitous and long-lived nature of  
27 microplastics makes them a worrying environmental contaminant, yet, despite their  
28 pervasiveness, very little is known about how microplastics might be impacting the health of  
29 species living in terrestrial ecosystems. This stands in stark contrast to the fact that 80% of  
30 species live on land (Grosberg et al., 2012), and that the volume of microplastics in terrestrial  
31 systems may be greater than that in oceans (de Souza Machado et al., 2012; Hurley & Nizzetto,  
32 2018).

33        Though evidence is still extremely limited, emerging studies are showing that  
34 microplastics represent a potentially serious threat to the health of terrestrial species, and may  
35 impact an array of biological functions (Huang et al., 2022; Lou et al., 2019). For instance, recent  
36 work in mice and rats has demonstrated the detrimental effects of microplastics on sperm  
37 production (Jin et al., 2021). Similarly, a study conducted by Wang et al. (2022) indicated that  
38 mice exposed to MPs experienced both necroptosis and inflammation within bladder epithelium,  
39 while Djouina et al. (2022) found that microplastics can adversely affect the small intestine and  
40 colon of mice, causing histological and immune disturbances, as well as inflammation. Data have  
41 been limited to *in vivo* studies on laboratory rodents that were force fed plastics, however, and  
42 there are currently no studies describing the health effects of microplastics exposure outside of  
43 laboratory settings. Thus, although the findings from these studies are certainly worrying, the  
44 extent to which they are representative of the conditions that humans and animals are actually  
45 experiencing in the real world is largely unknown. Here, we review the peer-reviewed literature  
46 to explore the extent to which lab studies on the effects of microplastics are representative of the

47 conditions that animals are experiencing in the real world. In particular we focused on  
48 understanding how the concentrations of microplastics and types of polymers being administered  
49 in lab studies compared to those found in terrestrial soils. Although our focus was on  
50 microplastics in soils, this is not the only path of exposure to microplastics. For instance, plants  
51 can uptake microplastics (Azeem et al., 2021), which can then be ingested by  
52 herbivorous/omnivorous species. Airborne microplastics can also be inhaled, with intake rates  
53 that may be comparable to ingestion (Cox et al., 2019). Most studies on airborne microplastics  
54 quantify concentrations in terms of deposition rates (Sridharan et al., 2021), however, making  
55 direct comparisons to lab studies impossible, and there is little information on the microplastic  
56 exposure and ingestion rates of free-ranging terrestrial species. Nonetheless, air and waterborne  
57 microplastics will ultimately accumulate in soils (Guo et al., 2020, Sridharan et al., 2021), and  
58 soils are at the base of many terrestrial food webs (de Souza Machado et al., 2018). The  
59 concentrations of microplastics in soils are thus likely to be broadly representative of exposure  
60 levels. Our results can help provide much needed context to the findings of existing health  
61 studies, as well as an ecologically relevant baseline that can help guide future lab studies on the  
62 health effects of terrestrial microplastics.

63

## 64 **2. Materials and methods**

65 We first identified studies from the peer-reviewed literature that were focused on the health  
66 effects of microplastics on terrestrial animals, or on microplastics in terrestrial soil environment  
67 via a Google Scholar search for the terms “microplastics”, “microplastics” and “mice”,  
68 “microplastics” and “rats”, “microplastics” and “rodents”, “microplastics in lab”, and  
69 “microplastics in soil”. Any *in vivo* lab studies not directly relating to the ingestion of

70 microplastics were excluded as they were beyond the scope of our effort. Similarly, studies  
71 where soil samples were taken from lakes or river beds were excluded as our focus was on  
72 describing the conditions being experienced by terrestrial species. Through this initial search, a  
73 total of 93 peer-reviewed studies were compiled; 55 studies focused on microplastics in *in vivo*  
74 lab studies, and 38 focused on microplastics in terrestrial soil environments. For *in vivo* studies  
75 we extracted information on the polymer type, concentrations fed to laboratory rodents, and  
76 diameter, volume, and density of the microplastic particles. The microplastic type and final  
77 concentrations found in the soil environment were extracted from soil studies. There was very  
78 little consistency in the units across studies, and so to standardize microplastic measurements, all  
79 concentrations were converted to items/kg. To do this, polymer type was required to identify the  
80 density of the plastic, while diameter was required to calculate the volume. The known volume,  
81 density, and concentrations were then used in conjunction to calculate the number of particles  
82 and convert the data to items/kg. If any information required to make this conversion was absent  
83 from a study, it was excluded from subsequent analyses. Similarly, soil studies were excluded if  
84 information on the concentrations of microplastic were absent, or if they were experimental  
85 studies. This further narrowed the number of studies down to a total of 28 *in vivo* studies  
86 describing 67 experimental concentrations, and 22 soil studies with data on 48 sites.

87

### 88 **3. Results and discussion**

89 The median concentration of microplastics fed to laboratory rodents in *in vivo* studies was  
90 36,841,422 items/kg. This was over 78,000 times greater than the median concentration of 471  
91 items/kg found in soil (Fig. 1A). The highest recorded concentration of microplastics in any soil  
92 sample was 18,760 items/kg which was found in agricultural soil along China's Chai river valley

93 (Zhang & Liu, 2019); only 5 out of the 28 compiled lab studies used concentrations below this  
94 amount. We also found that while 28 different plastic polymers have been found to occur in soil,  
95 the health effects of only 3 polymers have been studied to date, with the overwhelming majority  
96 of *in vivo* experiments having focused on polystyrene (Fig. 1B). The stark contrast between the  
97 types and concentrations of microplastics being administered to lab rodents in *in vivo* studies  
98 versus the conditions these animals are likely to encounter in the wild questions the utility of  
99 these findings and illustrates the need for more ecologically realistic studies.

100 Notably, and in light of this disconnect, a common trend across lab studies was the lack

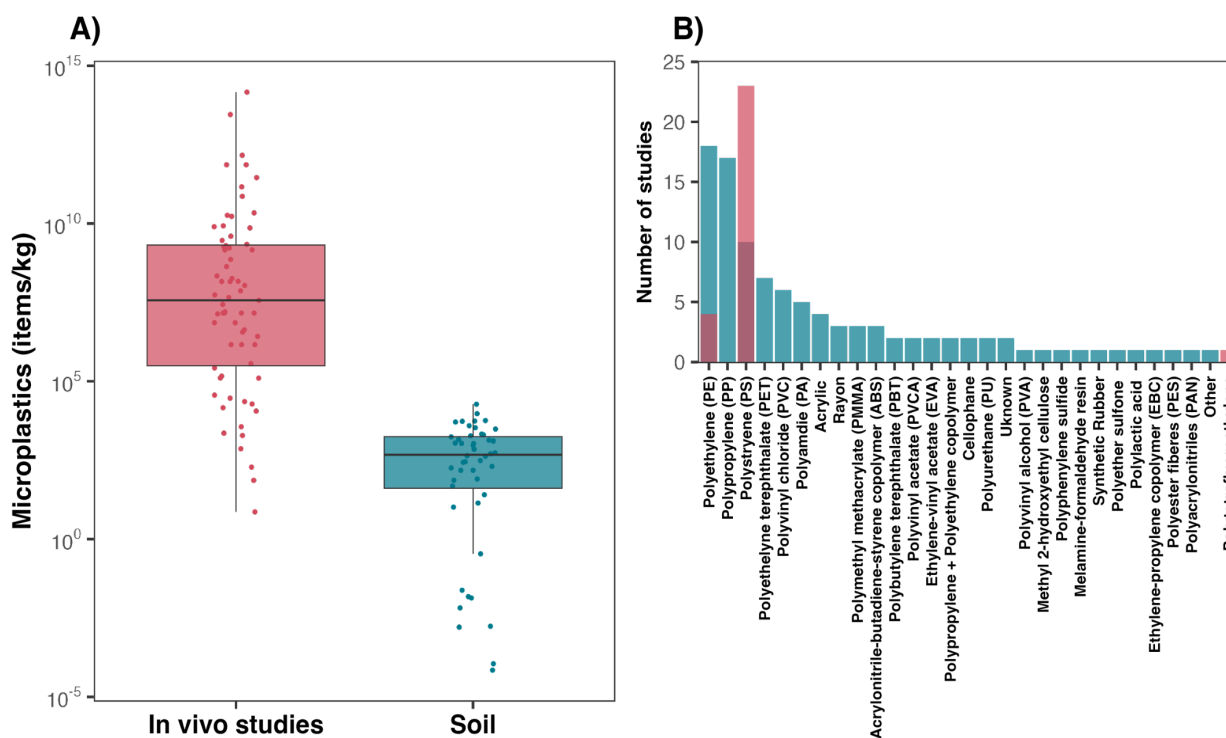

**Figure 1** The boxplot in A shows the concentrations of MPs fed to rodents in *in vivo* lab studies, compared to those of MPs found in soils. In B the number of soil studies which identified different plastic polymers are shown in blue, whereas the number of polymers assessed via *in vivo* health studies are shown in red. Data were compiled from 50 peer-reviewed studies; 22 on MPs in soil and 28 on the health effects of MPs.

101 of any rationale for the concentrations of microplastic that were administered. The 11 studies that  
102 did provide justification chose concentrations that were based either on the concentrations of

103 microplastic found in rivers (Liu et al., 2022), or on existing *in vivo* studies (Choi et al., 2021,  
104 Hou et al., 2021; Li et al., 2020; Lou et al., 2019; Mu et al., 2022; Shi et al., 2022; Wang et al.,  
105 2022; Wang et al., 2022; Yang et al., 2019; Yang et al., 2022). For instance, Yang et al. (2019)  
106 and Mu et al. (2022), both based their study designs on work on mice by Deng et al. (2017).  
107 Deng et al. (2017) which, however, based their study on MP concentrations found in rivers, and  
108 therefore it does not accurately depict terrestrial environments. Thus, while a handful of lab  
109 studies did provide some form of justification for their study design, the extent to which these  
110 studies are representative of the conditions that humans and animals are actually experiencing in  
111 the real world is questionable.

112

#### 113 **4. Conclusions**

114 The plastic pollution crisis is arguably one of the most pressing ecological and public health  
115 issues of our time, yet existing research on the health effects of terrestrial microplastics does not  
116 accurately reflect the conditions that humans and animals are actually experiencing. Paired with  
117 this disconnect is the fact that 1,196 animals were sacrificed to generate the findings of these 28  
118 studies, yet the majority of these animals were fed tens to hundreds of thousands of times more  
119 plastic than they would ever be exposed to in the wild. Because microplastics research also  
120 receives frequent media attention, performing true-to-life studies is of the utmost importance so  
121 as to not erode the public's faith in the scientific process. It therefore falls on the scientific  
122 community to describe the ecologically realistic effects of microplastics on the health of  
123 terrestrial species in order for well-founded mitigation efforts to be launched. Going forward,  
124 performing more true-to-life research will be of the utmost importance to understand the impacts  
125 of microplastics and maintain the public's faith in the scientific process.

126

127 **Acknowledgments:** This work was supported by an NSERC Discovery Grant RGPIN-2021-  
128 02758 to MJN, as well as the Canadian Foundation for Innovation. MAMMF was supported by  
129 LMUexcellent, funded by the Federal Ministry of Education and Research (BMBF) and the Free  
130 State of Bavaria under the Excellence Strategy of the Federal Government and the Länder.

131 **Author contributions:** MJN and MAMMF conceived of the study, CLM and JS conducted the  
132 literature review, CLM and MJN wrote the first manuscript draft, and all co-authors assisted with  
133 writing the final version of the manuscript.

134 **Competing interests:** Authors declare that they have no competing interests.

135 **Data and materials availability:** The data and R scripts used to carry out this study are openly  
136 available on GitHub at [https://github.com/QuantitativeEcologyLab/MP\\_Disconnect](https://github.com/QuantitativeEcologyLab/MP_Disconnect).

137

## 138 5. References

139 Azeem, I., Adeel, M., Ahmad, M. A., Shakoor, N., Jiangcuo, G. D., Azeem, K., Ishfaq, M.,  
140 Shakoor, A., Ayaz, M., Xu, M., & Rui, Y. (2021). Uptake and Accumulation of  
141 Nano/Microplastics in Plants: a Critical Review. *Nanomaterials (Basel, Switzerland)*, *11*(11),  
142 2935. <https://doi.org/10.3390/nano11112935>

143 Bergami, E., Rota, E., Caruso, T., Birarda, G., Vaccari, L., & Corsi, I. (2020). Plastics  
144 everywhere: First evidence of polystyrene fragments inside the common Antarctic collembolan  
145 *Cryptopygus antarcticus*. *Biology Letters (2005)*, *16*(6), 20200093.  
146 <https://doi.org/10.1098/rsbl.2020.0093>



- 147 Boughattas, I., Hattab, S., Zitouni, N., Mkhinini, M., Missawi, O., Bousserhine, N., & Banni, M.  
148 (2021). Assessing the presence of microplastic particles in Tunisian agriculture soils and their  
149 potential toxicity effects using *Eisenia andrei* as bioindicator. *The Science of the Total*  
150 *Environment*, 796, 148959-148959. <https://doi.org/10.1016/j.scitotenv.2021.148959>
- 151 Chai, B., Wei, Q., She, Y., Lu, G., Dang, Z., & Yin, H. (2020). Soil microplastic pollution in an  
152 e-waste dismantling zone of China. *Waste Management (Elmsford)*, 118, 291-301.  
153 <https://doi.org/10.1016/j.wasman.2020.08.048>
- 154 Chen, Y., Leng, Y., Liu, X., & Wang, J. (2020). Microplastic pollution in vegetable farmlands of  
155 suburb Wuhan, central China. *Environmental Pollution (1987)*, 257, 113449-113449.  
156 <https://doi.org/10.1016/j.envpol.2019.113449>
- 157 Choi, Y. J., Kim, J. E., Lee, S. J., Gong, J. E., Jin, Y. J., Seo, S., Lee, J. H., & Hwang, D. Y.  
158 (2021). Inflammatory response in the mid colon of ICR mice treated with polystyrene  
159 microplastics for two weeks. *Laboratory Animal Research*, 37(1), 31-31.  
160 <https://doi.org/10.1186/s42826-021-00109-w>
- 161 Choi, Y. J., Park, J. W., Kim, J. E., Lee, S. J., Gong, J. E., Jung, Y., Seo, S., & Hwang, D. Y.  
162 (2021). Novel Characterization of Constipation Phenotypes in ICR Mice Orally Administrated  
163 with Polystyrene Microplastics. *International Journal of Molecular Sciences*, 22(11), 5845.  
164 <https://doi.org/10.3390/ijms22115845>
- 165 Choi, Y. R., Kim, Y., Yoon, J., Dickinson, N., & Kim, K. (2021). Plastic contamination of forest,  
166 urban, and agricultural soils: A case study of Yeosu city in the Republic of Korea. *Journal of*  
167 *Soils and Sediments*, 21(5), 1962-1973. <https://doi.org/10.1007/s11368-020-02759-0>

- 168 Cole, M., Lindeque, P., Halsband, C. & Galloway, T. S. (2011) Microplastics as contaminants in  
169 the marine environment: A review. *Marine Pollution Bulletin*, 62(12), 2588–2597.  
170 <https://doi.org/10.1016/j.marpolbul.2011.09.025>
- 171 Corradini, F., Casado, F., Leiva, V., Huerta-Lwanga, E., & Geissen, V. (2021). Microplastics  
172 occurrence and frequency in soils under different land uses on a regional scale. *The Science of*  
173 *the Total Environment*, 752, 141917-141917. <https://doi.org/10.1016/j.scitotenv.2020.141917>
- 174 Cox, K. D., Covernton, G. A., Davies, H. L., Dower, J. F., Juanes, F., & Dudas, S. E. (2019).  
175 Human Consumption of Microplastics. *Environmental Science & Technology*, 53(12), 7068-  
176 7074. <https://doi.org/10.1021/acs.est.9b01517>
- 177 Crossman, J., Hurley, R. R., Futter, M., Nizzetto, L., & Sveriges lantbruksuniversitet. (2020).  
178 Transfer and transport of microplastics from biosolids to agricultural soils and the wider  
179 environment. *The Science of the Total Environment*, 724, 138334-138334.  
180 <https://doi.org/10.1016/j.scitotenv.2020.138334>
- 181 de Souza Machado, A. A., Kloas, W., Zarfl, C., Hempel, S. & Rillig, M. C. (2018). Microplastics  
182 as an emerging threat to terrestrial ecosystems. *Global Change Biology*, 24(4), 1405-1416.  
183 <https://doi.org/10.1111/gcb.14020>
- 184 Deng, Y., Chen, H., Huang, Y., Wang, Q., Chen, W., & Chen, D. (2022). Polystyrene  
185 Microplastics Affect the Reproductive Performance of Male Mice and Lipid Homeostasis in their  
186 Offspring. *Environmental Science & Technology Letters*, 9(9), 752-757.  
187 <https://doi.org/10.1021/acs.estlett.2c00262>

- 188 Djouina, M., Vignal, C., Dehaut, A., Caboche, S., Hirt, N., Waxin, C., Himber, C., Beury, D.,  
189 Hot, D., Dubuquoy, L., Launay, D., Duflos, G., & Body-Malapel, M. (2022). Oral exposure to  
190 polyethylene microplastics alters gut morphology, immune response, and microbiota  
191 composition in mice. *Environmental Research*, 212(Pt B), 113230-  
192 113230. <https://doi.org/10.1016/j.envres.2022.113230>
- 193 Duis, K., & Coors, A. (2016). Microplastics in the aquatic and terrestrial environment: Sources  
194 (with a specific focus on personal care products), fate and effects. *Environmental Sciences*  
195 *Europe*, 28(1), 2-25. <https://doi.org/10.1186/s12302-015-0069-y>
- 196 Geyer, R., Jambeck, J. R., & Law, K. L. (2017). Production, use, and fate of all plastics ever  
197 made. *Science Advances*, 3(7), e1700782-e1700782. <https://doi.org/10.1126/sciadv.1700782>
- 198 Grosberg, R. K., Vermeij, G. J. & Wainwright, P. C. (2012). Biodiversity in water and on land.  
199 *Current Biology*, 22(1), R900–R903. <https://doi.org/10.1016/j.cub.2012.09.050>
- 200 Guo, J., Huang, X., Xiang, L., Wang, Y., Li, Y., Li, H., Cai, Q., Mo, C., & Wong, M. (2020).  
201 Source, migration and toxicology of microplastics in soil. *Environment International*, 137,  
202 105263. <https://doi.org/10.1016/j.envint.2019.105263>
- 203 Helcoski, R., Yonkos, L. T., Sanchez, A., & Baldwin, A. H. (2020). Wetland soil microplastics  
204 are negatively related to vegetation cover and stem density. *Environmental Pollution (1987)*,  
205 256, 113391-113391. <https://doi.org/10.1016/j.envpol.2019.113391>
- 206 Hou, B., Wang, F., Liu, T., & Wang, Z. (2021). Reproductive toxicity of polystyrene  
207 microplastics: In vivo experimental study on testicular toxicity in mice. *Journal of Hazardous*  
208 *Materials*, 405, 124028. <https://doi.org/10.1016/j.jhazmat.2020.124028>

- 209 Hou, J., Lei, Z., Cui, L., Hou, Y., Yang, L., An, R., Wang, Q., Li, S., Zhang, H., & Zhang, L.  
210 (2021). Polystyrene microplastics lead to pyroptosis and apoptosis of ovarian granulosa cells via  
211 NLRP3/Caspase-1 signaling pathway in rats. *Ecotoxicology and Environmental Safety*, 212,  
212 112012. <https://doi.org/10.1016/j.ecoenv.2021.112012>
- 213 Hu, C., Lu, B., Guo, W., Tang, X., Wang, X., Xue, Y., Wang, L., He, X. (2021). Distribution of  
214 microplastics in mulched soil in Xinjiang, China. *International Journal of Agricultural and*  
215 *Biological Engineering*, 14(2), 196-204. <https://doi.org/10.25165/j.ijabe.20211402.6165>
- 216 Huang, J., Dong, G., Liang, M., Wu, X., Xian, M., An, Y., Zhan, J., Xu, L., Xu, J., Sun, W.,  
217 Chen, S., Chen, C., & Liu, T. (2022). Toxicity of microplastics with different size and surface  
218 charge on human nasal epithelial cells and rats via intranasal exposure. *Chemosphere (Oxford)*,  
219 307. <https://doi.org/10.1016/j.chemosphere.2022.136093>
- 220 Huang, Y., Liu, Q., Jia, W., Yan, C., & Wang, J. (2020). Agricultural plastic mulching as a  
221 source of microplastics in the terrestrial environment. *Environmental Pollution (1987)*, 260,  
222 114096. <https://doi.org/10.1016/j.envpol.2020.114096>
- 223 Hurley, R. R. & Nizzetto, L. Fate and occurrence of micro(nano)plastics in soils: Knowledge  
224 gaps and possible risks. *Current Opinion in Environmental Science & Health*, 1, 6-11.  
225 <https://doi.org/10.1016/j.coesh.2017.10.006>
- 226 Ijaz, M. U., Shahzadi, S., Samad, A., Ehsan, N., Ahmed, H., Tahir, A., Rehman, H., & Anwar,  
227 H. (2021). Dose-Dependent Effect of Polystyrene Microplastics on the Testicular Tissues of the  
228 Male Sprague Dawley Rats. *Dose-Response*, 19(2), 155932582110198-15593258211019882.  
229 <https://doi.org/10.1177/15593258211019882>

- 230 Ilechukwu, I., Ehigiator, B. E., Ben, I. O., Okonkwo, C. J., Olorunfemi, O. S., Modu, U. E.,  
231 Ilechukwu, C. E., & Ohagwa, N. J. (2022). Chronic toxic effects of polystyrene microplastics on  
232 reproductive parameters of male rats. *Environmental Analysis, Health and Toxicology*, 37(2),  
233 e2022015-e2022010. <https://doi.org/10.5620/eaht.2022015>
- 234 Jin, H., Ma, T., Sha, X., Liu, Z., Zhou, Y., Meng, X., Chen, Y., Han, X., & Ding, J. (2021).  
235 Polystyrene microplastics induced male reproductive toxicity in mice. *Journal of Hazardous*  
236 *Materials*, 401, 123430. <https://doi.org/10.1016/j.jhazmat.2020.123430>
- 237 Jin, Y., Lu, L., Tu, W., Luo, T., & Fu, Z. (2019). Impacts of polystyrene microplastic on the gut  
238 barrier, microbiota and metabolism of mice. *The Science of the Total Environment*, 649, 308-  
239 317. <https://doi.org/10.1016/j.scitotenv.2018.08.353>
- 240 Lechthaler, S., Esser, V., Schüttrumpf, H., & Stauch, G. (2021). Why analysing microplastics in  
241 floodplains matters: Application in a sedimentary context. *Environmental Science--Processes &*  
242 *Impacts*, 23(1), 117-131. <https://doi.org/10.1039/d0em00431f>
- 243 Lee, S., Kang, K., Sung, S., Choi, J., Sung, M., Seong, K., Lee, J., Kang, S., Yang, S. Y., Lee, S.,  
244 Lee, K., Seo, M., & Kim, K. (2022). In Vivo Toxicity and Pharmacokinetics of  
245 Polytetrafluoroethylene Microplastics in ICR Mice. *Polymers*, 14(11), 2220.  
246 <https://doi.org/10.3390/polym14112220>
- 247 Lee, S., Kang, K., Sung, S., Choi, J., Sung, M., Seong, K., Lee, S., Yang, S. Y., Seo, M., & Kim,  
248 K. (2022). Toxicity Study and Quantitative Evaluation of Polyethylene Microplastics in ICR  
249 Mice. *Polymers*, 14(3), 402. <https://doi.org/10.3390/polym14030402>

250 Li, B., Ding, Y., Cheng, X., Sheng, D., Xu, Z., Rong, Q., Wu, Y., Zhao, H., Ji, X., & Zhang, Y.

251 (2020). Polyethylene microplastics affect the distribution of gut microbiota and inflammation

252 development in mice. *Chemosphere (Oxford)*, *244*, 125492-125492.

253 <https://doi.org/10.1016/j.chemosphere.2019.125492>

254 Li, W., Wufuer, R., Duo, J., Wang, S., Luo, Y., Zhang, D., & Pan, X. (2020). Microplastics in

255 agricultural soils: Extraction and characterization after different periods of polythene film

256 mulching in an arid region. *The Science of the Total Environment*, *749*, 141420.

257 <https://doi.org/10.1016/j.scitotenv.2020.141420>

258 Li, Z., Zhu, S., Liu, Q., Wei, J., Jin, Y., Wang, X., & Zhang, L. (2020). Polystyrene microplastics

259 cause cardiac fibrosis by activating Wnt/ $\beta$ -catenin signaling pathway and promoting

260 cardiomyocyte apoptosis in rats. *Environmental Pollution (1987)*, *265*, 115025-115025.

261 <https://doi.org/10.1016/j.envpol.2020.115025>

262 Liu, S., Li, H., Wang, J., Wu, B., & Guo, X. (2022). Polystyrene microplastics aggravate

263 inflammatory damage in mice with intestinal immune imbalance. *The Science of the Total*

264 *Environment*, *833*, 155198-155198. <https://doi.org/10.1016/j.scitotenv.2022.155198>

265 Lu, L., Wan, Z., Luo, T., Fu, Z., & Jin, Y. (2018). Polystyrene microplastics induce gut

266 microbiota dysbiosis and hepatic lipid metabolism disorder in mice. *The Science of the Total*

267 *Environment*, *631-632*, 449-458. <https://doi.org/10.1016/j.scitotenv.2018.03.051>

268 Luo, T., Wang, C., Pan, Z., Jin, C., Fu, Z., & Jin, Y. (2019). Maternal Polystyrene Microplastic

269 Exposure during Gestation and Lactation Altered Metabolic Homeostasis in the Dams and their

- 270 F1 and F2 offspring. *Environmental Science & Technology*, 53(18), 10978-10992.
- 271 <https://doi.org/10.1021/acs.est.9b03191>
- 272 Lv, W., Zhou, W., Lu, S., Huang, W., Yuan, Q., Tian, M., Lv, W., & He, D. (2019). Microplastic  
273 pollution in rice-fish co-culture system: A report of three farmland stations in Shanghai, China.  
274 *The Science of the Total Environment*, 652, 1209-1218.
- 275 <https://doi.org/10.1016/j.scitotenv.2018.10.321>
- 276 Mu, Y., Sun, J., Li, Z., Zhang, W., Liu, Z., Li, C., Peng, C., Cui, G., Shao, H., & Du, Z. (2022).  
277 Activation of pyroptosis and ferroptosis is involved in the hepatotoxicity induced by polystyrene  
278 microplastics in mice. *Chemosphere (Oxford)*, 291(Pt 2), 132944-132944.
- 279 <https://doi.org/10.1016/j.chemosphere.2021.132944>
- 280 Piehl, S., Leibner, A., Löder, M. G. J., Dris, R., Bogner, C., & Laforsch, C. (2018). Identification  
281 and quantification of macro- and microplastics on an agricultural farmland. *Scientific Reports*,  
282 8(1), 17950-9. <https://doi.org/10.1038/s41598-018-36172-y>
- 283 Ragoobur, D., Huerta-Lwanga, E., & Somaroo, G. D. (2021). Microplastics in agricultural soils,  
284 wastewater effluents and sewage sludge in Mauritius. *The Science of the Total Environment*, 798,  
285 149326-149326. <https://doi.org/10.1016/j.scitotenv.2021.149326>
- 286 Rochman, C. M., & Hoellein, T. (2020). The global odyssey of plastic pollution. *Science*  
287 (*American Association for the Advancement of Science*), 368(6496), 1184-1185.
- 288 <https://doi.org/10.1126/science.abc4428>

- 289 Scopetani, C., Chelazzi, D., Cincinelli, A., Martellini, T., Leiniö, V., & Pellinen, J. (2022).  
290 Hazardous contaminants in plastics contained in compost and agricultural soil. *Chemosphere*  
291 (*Oxford*), 293, 133645-133645. <https://doi.org/10.1016/j.chemosphere.2022.133645>
- 292 Shi, J., Deng, H., & Zhang, M. (2022). Whole transcriptome sequencing analysis revealed key  
293 RNA profiles and toxicity in mice after chronic exposure to microplastics. *Chemosphere*  
294 (*Oxford*), 304, 135321-135321. <https://doi.org/10.1016/j.chemosphere.2022.135321>
- 295 Sobhani, Z., Luo, Y., Gibson, C. T., Tang, Y., Naidu, R., Megharaj, M., & Fang, C. (2021).  
296 Collecting Microplastics in Gardens: Case Study (i) of Soil. *Frontiers in Environmental Science*,  
297 9. <https://doi.org/10.3389/fenvs.2021.739775>
- 298 Sridharan, S., Kumar, M., Singh, L., Bolan, N.S., & Saha, M. (2021). Microplastics as an  
299 emerging source of particulate air pollution: A critical review. *Journal of Hazardous Materials*,  
300 418, 126245. <https://doi.org/10.1016/j.jhazmat.2021.126245>
- 301 Tagg, A. S., Brandes, E., Fischer, F., Fischer, D., Brandt, J., Labrenz, M. (2022). Agricultural  
302 application of microplastic-rich sewage sludge leads to further uncontrolled contamination. *The*  
303 *Science of the Total Environment*, 806(Pt 4), 150611-150611.  
304 <https://doi.org/10.1016/j.scitotenv.2021.150611>
- 305 Thompson, R. C., Swan, S. H., Moore, C. J., & vom Saal, F. S. (2009). Our plastic age.  
306 *Philosophical Transactions of the Royal Society B: Biological Sciences*, 364(1526), 1973-1976.  
307 <https://doi.org/10.1098/rstb.2009.0054>



- 308 van den Berg, P., Huerta-Lwanga, E., Corradini, F., & Geissen, V. (2020). Sewage sludge  
309 application as a vehicle for microplastics in eastern Spanish agricultural soils. *Environmental*  
310 *Pollution (1987)*, 261, 114198-114198. <https://doi.org/10.1016/j.envpol.2020.114198>
- 311 Wang, J., Li, J., Liu, S., Li, H., Chen, X., Peng, C., Zhang, P., & Liu, X. (2021). Distinct  
312 microplastic distributions in soils of different land-use types: A case study of Chinese farmlands.  
313 *Environmental Pollution (1987)*, 269, 116199. <https://doi.org/10.1016/j.envpol.2020.116199>
- 314 Wang, Q., Wu, Y., Zhang, W., Shen, T., Li, H., Wu, J., Zhang, L., Qin, L., Chen, R., Gu, W.,  
315 Sun, Q., Liu, C., & Li, R. (2022). Lipidomics and transcriptomics insight into impacts of  
316 microplastics exposure on hepatic lipid metabolism in mice. *Chemosphere (Oxford)*, 308,  
317 136591-136591. <https://doi.org/10.1016/j.chemosphere.2022.136591>
- 318 Wang, Y., Wang, S., Xu, T., Cui, W., Shi, X., & Xu, S. (2022). A new discovery of polystyrene  
319 microplastics toxicity: The injury difference on bladder epithelium of mice is correlated with the  
320 size of exposed particles. *The Science of the Total Environment*, 821, 153413-153413.  
321 <https://doi.org/10.1016/j.scitotenv.2022.153413>
- 322 Weber, C. J. & Bigalke, M. (2022). Opening Space for Plastics—Why Spatial, Soil and Land  
323 Use Data Are Important to Understand Global Soil (Micro)Plastic Pollution. *Microplastics*, 1,  
324 610–626. [10.3390/microplastics1040042](https://doi.org/10.3390/microplastics1040042)
- 325 Wei, J., Wang, X., Liu, Q., Zhou, N., Zhu, S., Li, Z., Li, X., Yao, J., & Zhang, L. (2021). The  
326 impact of polystyrene microplastics on cardiomyocytes pyroptosis through NLRP3/Caspase-1  
327 signaling pathway and oxidative stress in Wistar rats. *Environmental Toxicology*, 36(5), 935-944.  
328 <https://doi.org/10.1002/tox.23095>

- 329 Wen, S., Zhao, Y., Liu, S., Yuan, H., You, T., & Xu, H. (2022). Microplastics-perturbed gut  
330 microbiota triggered the testicular disorder in male mice: Via fecal microbiota transplantation.  
331 *Environmental Pollution (1987)*, 309, 119789-119789.  
332 <https://doi.org/10.1016/j.envpol.2022.119789>
- 333 Wu, H., Xu, T., Chen, T., Liu, J., & Xu, S. (2022). Oxidative stress mediated by the  
334 TLR4/NOX2 signalling axis is involved in polystyrene microplastic-induced uterine fibrosis in  
335 mice. *The Science of the Total Environment*, 838(Pt 2), 155825-155825.  
336 <https://doi.org/10.1016/j.scitotenv.2022.155825>
- 337 Yang, X., Jiang, J., Wang, Q., Duan, J., Chen, N., Wu, D., & Xia, Y. (2022). Gender difference  
338 in hepatic AMPK pathway activated lipid metabolism induced by aged polystyrene microplastics  
339 exposure. *Ecotoxicology and Environmental Safety*, 245, 114105-114105.  
340 <https://doi.org/10.1016/j.ecoenv.2022.114105>
- 341 Yang, Y., Chen, C., Lu, T., & Liao, C. (2019). Toxicity-based toxicokinetic/toxicodynamic  
342 assessment for bioaccumulation of polystyrene microplastics in mice. *Journal of Hazardous*  
343 *Materials*, 366, 703-713. <https://doi.org/10.1016/j.jhazmat.2018.12.048>
- 344 Yu, L., Zhang, J., Liu, Y., Chen, L., Tao, S., & Liu, W. (2021). Distribution characteristics of  
345 microplastics in agricultural soils from the largest vegetable production base in China. *The*  
346 *Science of the Total Environment*, 756, 143860-143860.  
347 <https://doi.org/10.1016/j.scitotenv.2020.143860>

- 348 Zhang, G. S., & Liu, Y. F. (2018). The distribution of microplastics in soil aggregate fractions in  
349 southwestern China. *The Science of the Total Environment*, 642, 12-20.  
350 <https://doi.org/10.1016/j.scitotenv.2018.06.004>
- 351 Zheng, H., Wang, J., Wei, X., Chang, L., & Liu, S. (2021). Proinflammatory properties and lipid  
352 disturbance of polystyrene microplastics in the livers of mice with acute colitis. *The Science of*  
353 *the Total Environment*, 750, 143085-143085. <https://doi.org/10.1016/j.scitotenv.2020.143085>
- 354 Zhou, B., Wang, J., Zhang, H., Shi, H., Fei, Y., Huang, S., Tong, Y., Wen, D., Luo, Y., &  
355 Barceló, D. (2020). Microplastics in agricultural soils on the coastal plain of Hangzhou Bay, east  
356 China: Multiple sources other than plastic mulching film. *Journal of Hazardous Materials*, 388,  
357 121814-121814. <https://doi.org/10.1016/j.jhazmat.2019.121814>
